# Supplementary figures and images for: Optimization and Validation of Efficient Models for Predicting Polythiophene Self-Assembly
Source: Preprints.org preprint supplement (doi:10.20944/preprints201811.0115.v1), 2018-11-05

Non-Zero

S-CA-CA-S

CA-CA-CA-S

CA-CA-CT-CT

CA-CT-CT-CT

CT-CT-CT-CT

S

CT

CA

Zero

CA-CA-CA-CT

CA-CA-CA-CA

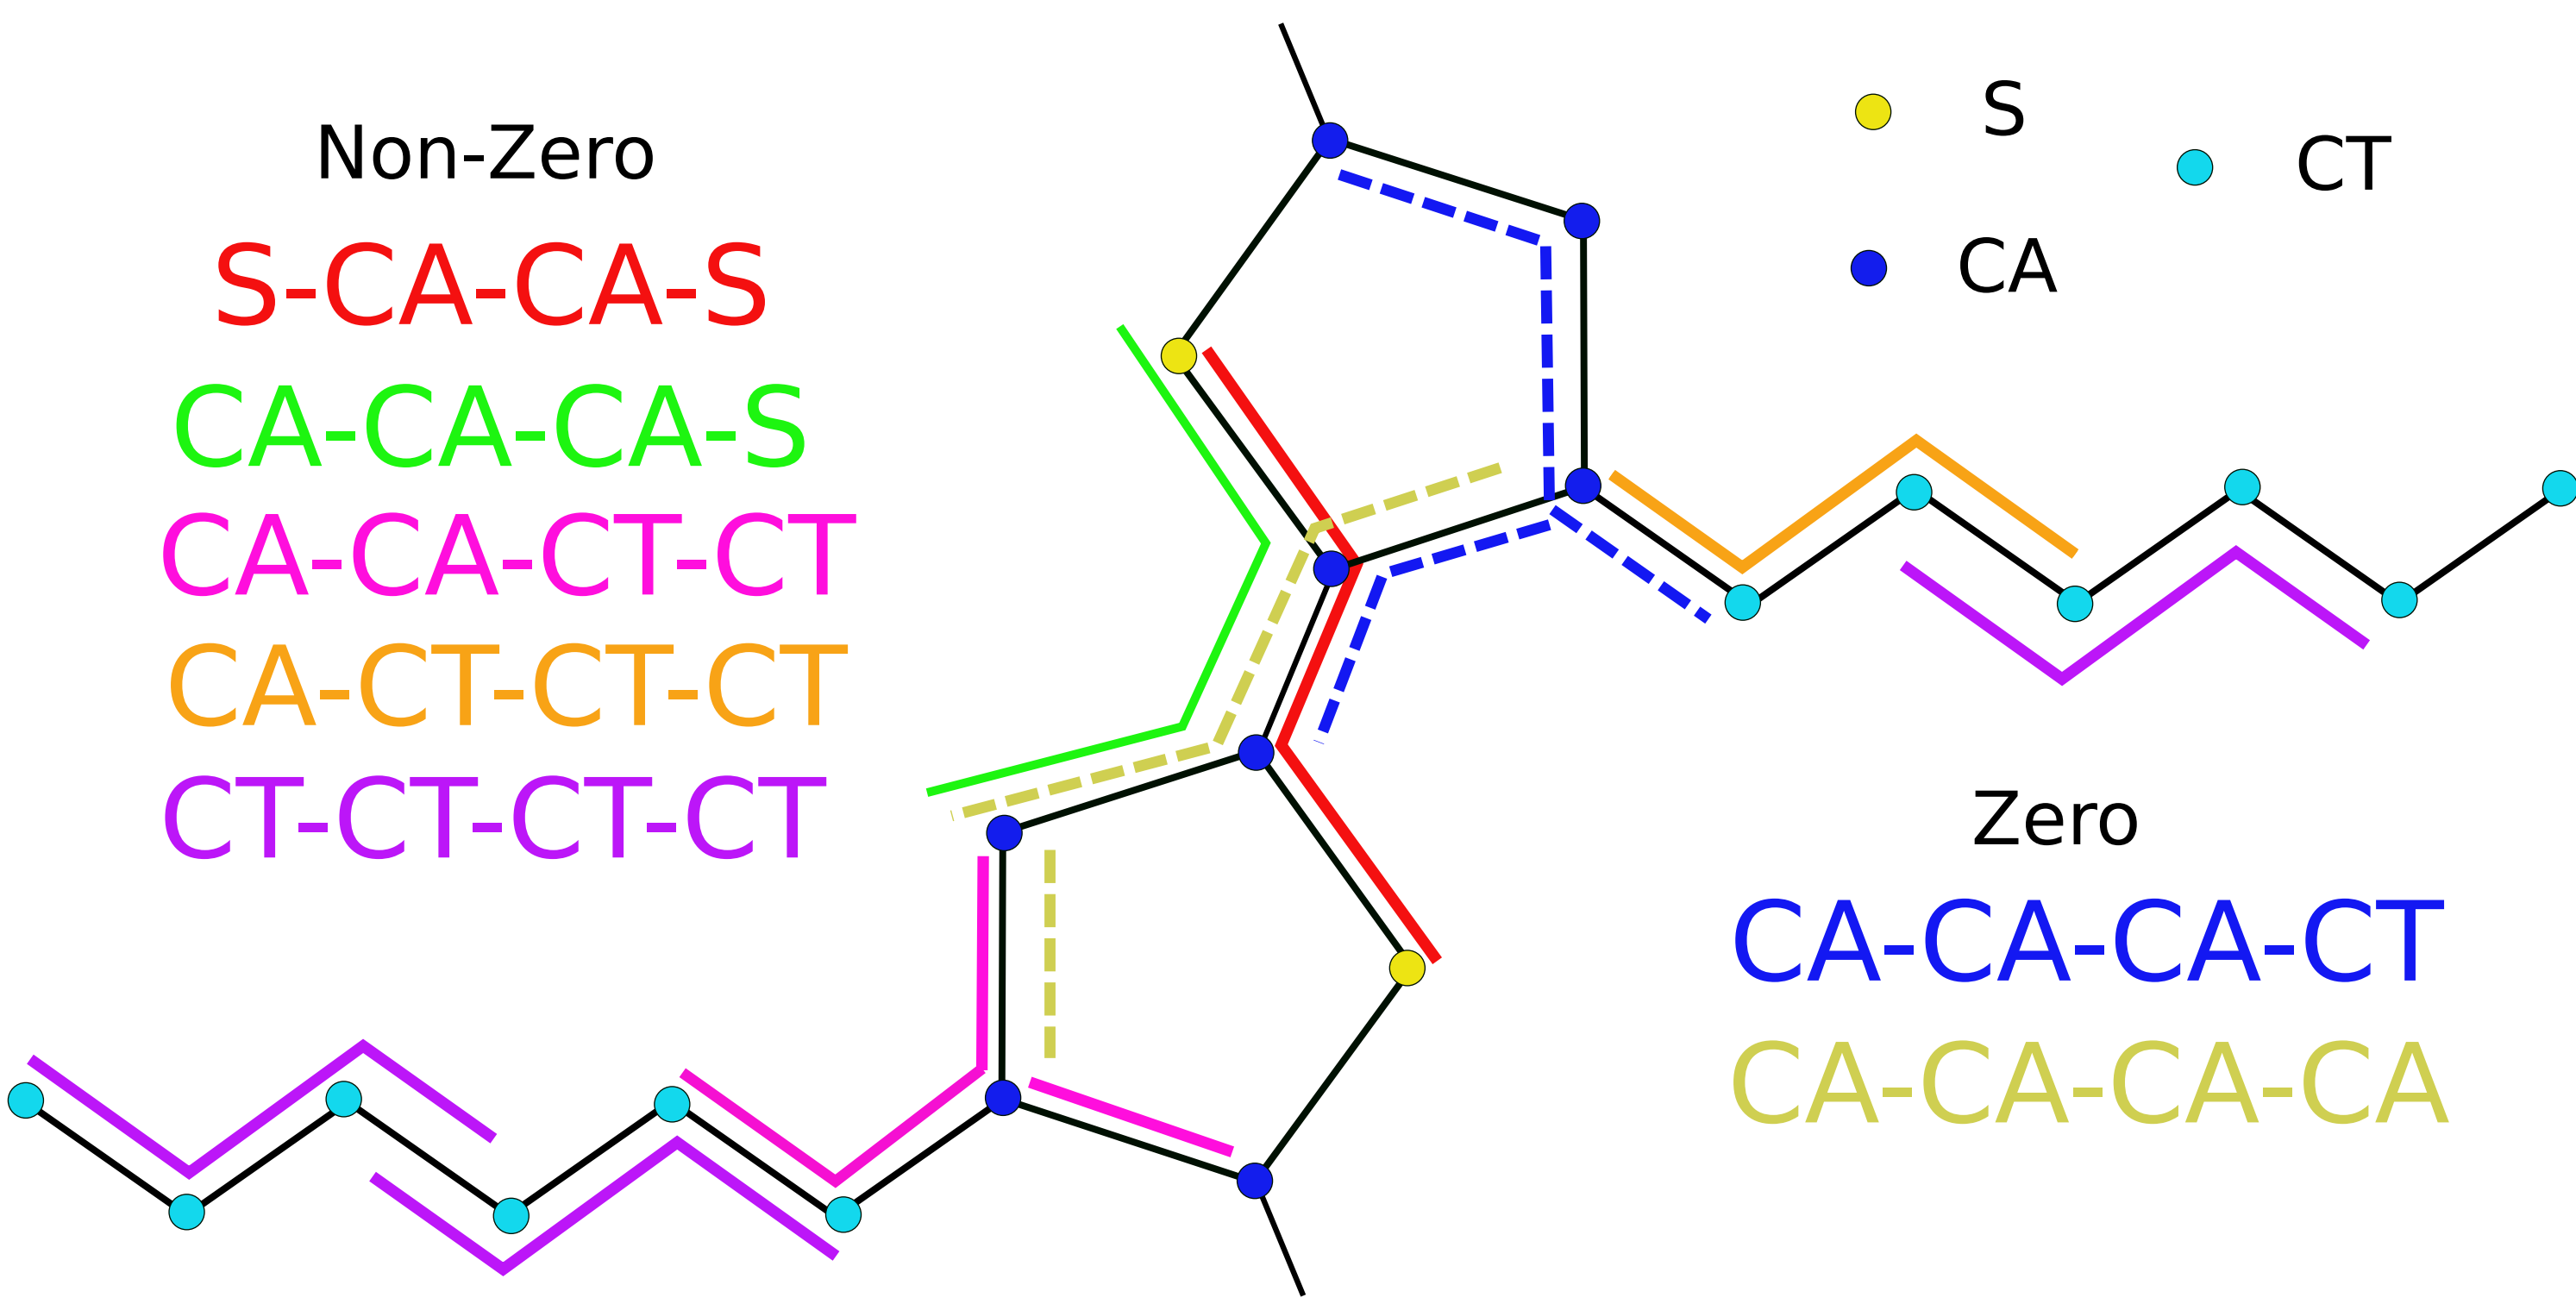

Supplement: Supplementary file 1 [file supplementary]

100-15mers

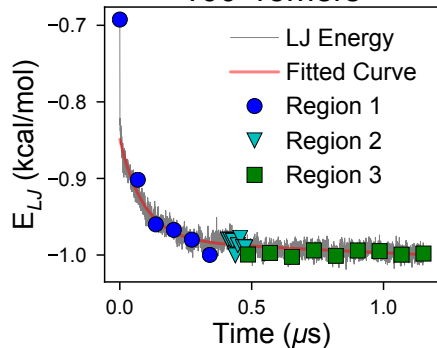

175-15mers

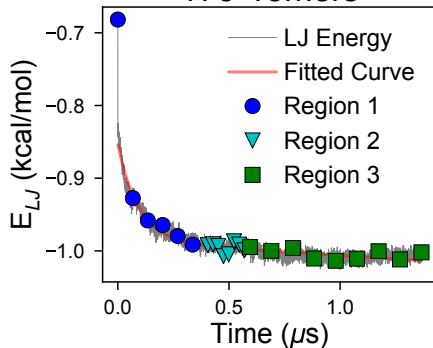

250-15mers

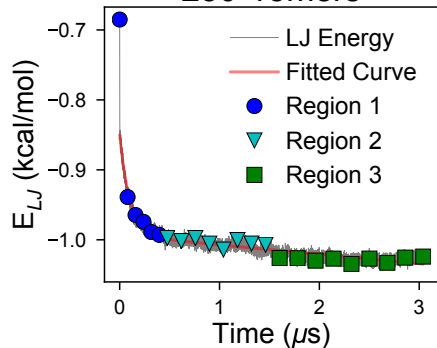

325-15mers

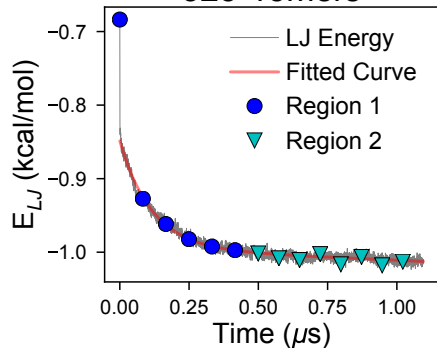

750-15mers

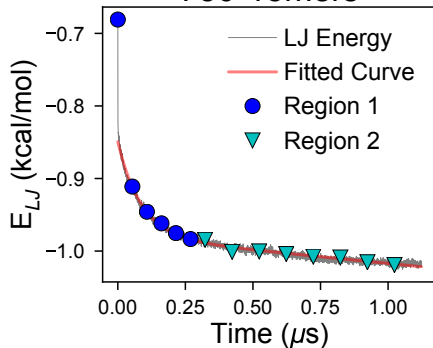

1000-15mers

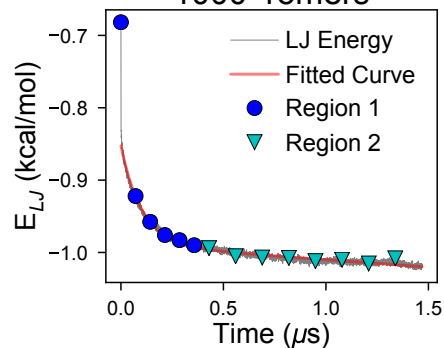

Supplement: Supplementary file 2 [file supplementary]

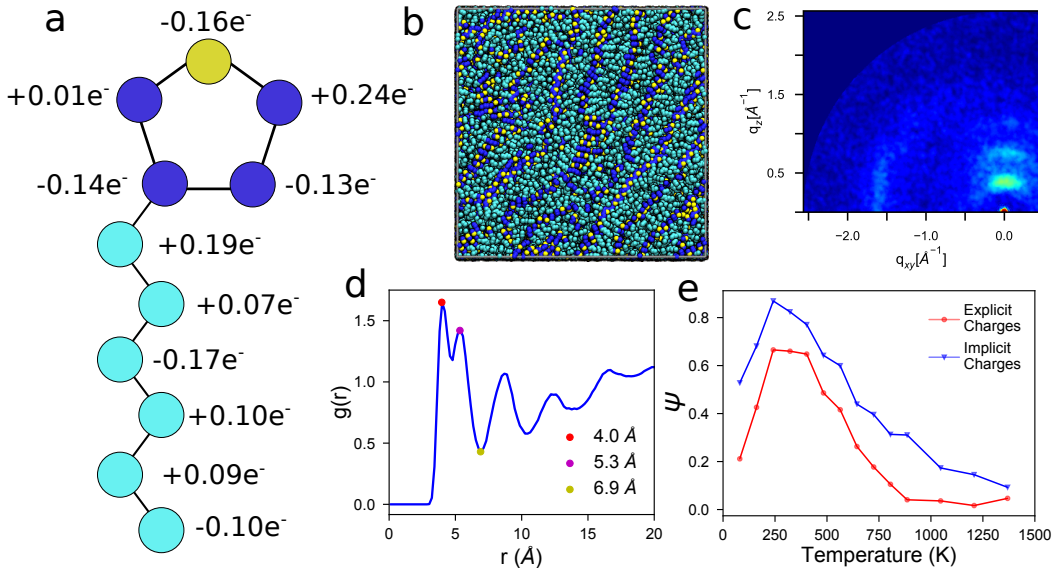

Supplement: Supplementary file 3 [file supplementary]

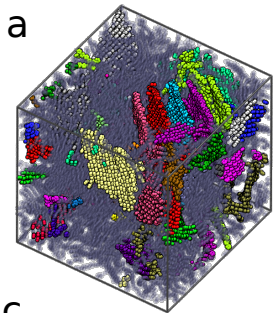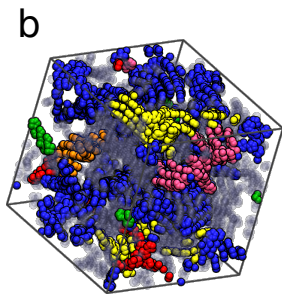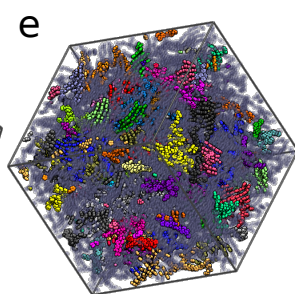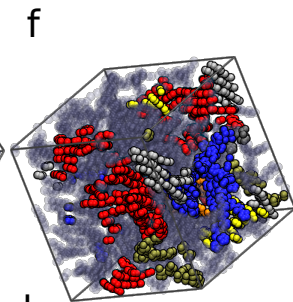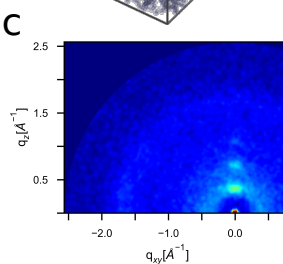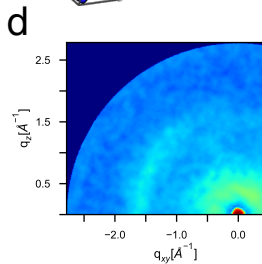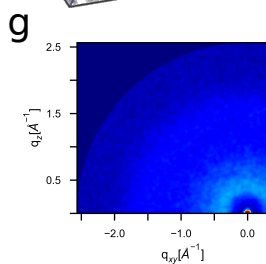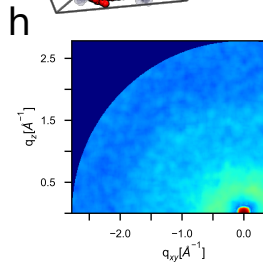

Supplement: Supplementary file 5 [file supplementary]

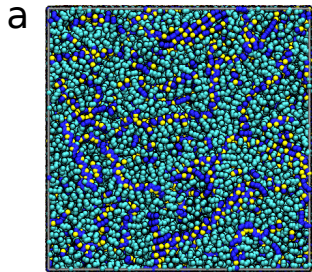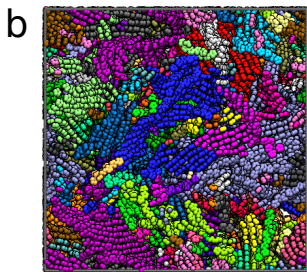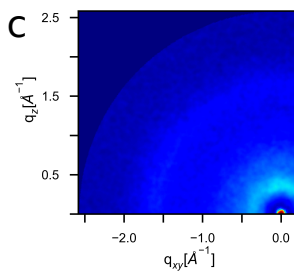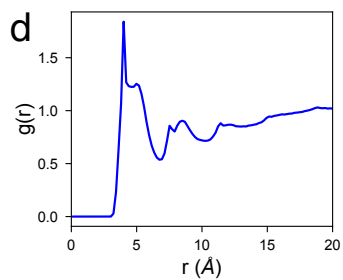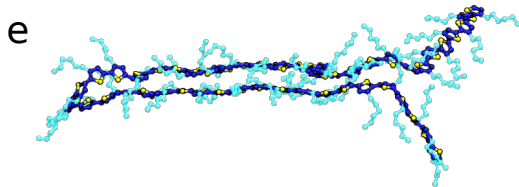

Supplement: Supplementary file 6 [file supplementary]

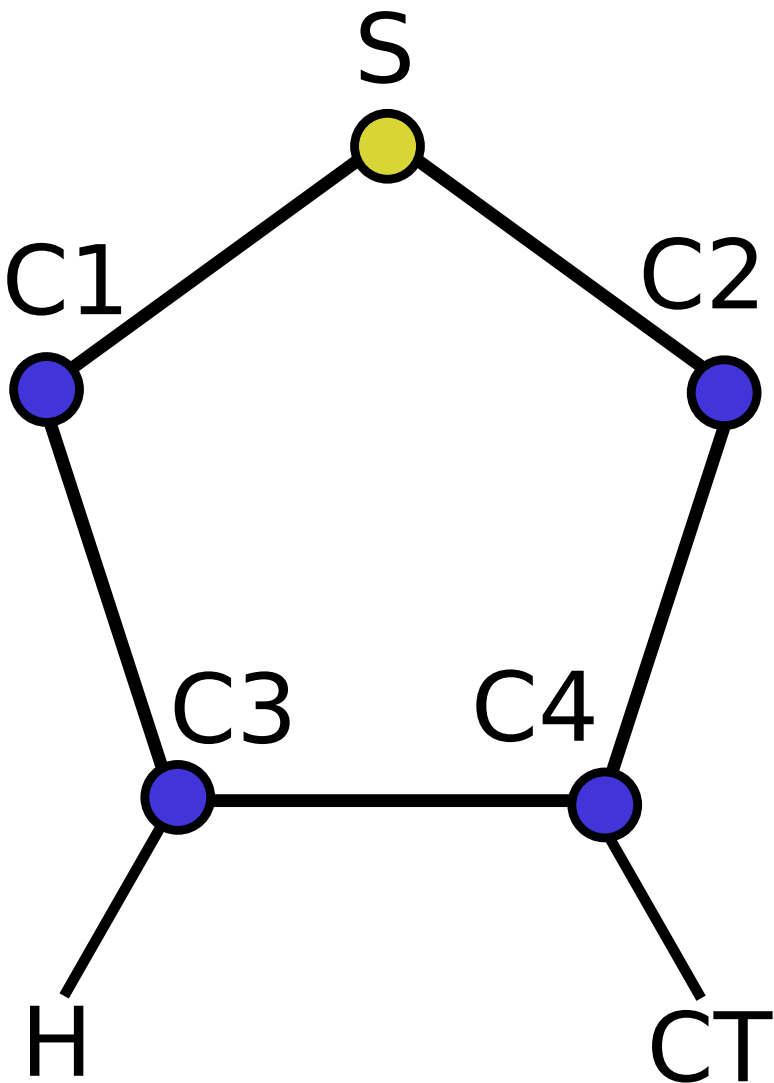

Supplement: Supplementary file 7 [file supplementary]

**a**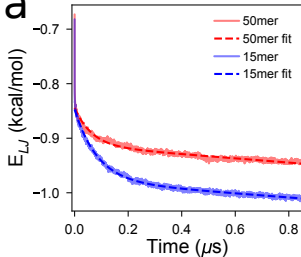**b**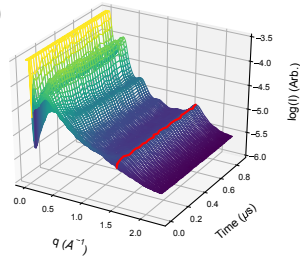**c**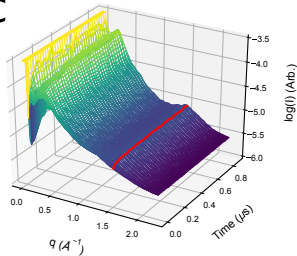**d**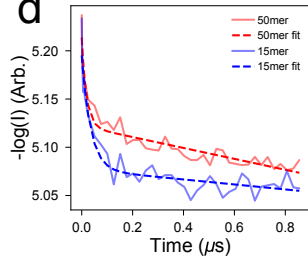

Supplement: Supplementary file 8 [file supplementary]
